# Supplementary material
Source: publisher figshare collection journal article supplement (https://acs.figshare.com/ndownloader/files/23743736)
Supplement: Supplementary file 1 [file 23743736]

## Supporting information

# Label-Free Bimetallic In Situ Grown 3D Nickel Foam Supported NH<sub>2</sub>-MIL-88B(Fe<sub>2</sub>Co)-MOF based Impedimetric Immunosensor for the Detection of Cardiac Troponin I

*Sathyadevi Palanisamy,<sup>1</sup> Duraisamy Senthil Raja,<sup>2</sup> Boopathi Subramani,<sup>3</sup> Tung-Ho Wu,<sup>4</sup> and Yun-Ming Wang<sup>1,5,\*</sup>*

<sup>1</sup>Department of Biological Science and Technology, Institute of Molecular Medicine and Bioengineering, Center for Intelligent Drug Systems and Smart Bio-devices (IDS<sup>2</sup>B), National Chiao Tung University, 75 Bo-Ai Street, Hsinchu 300, Taiwan.

<sup>2</sup>Department of Chemical Engineering, National Tsing Hua University, Hsinchu 30013, Taiwan.

<sup>3</sup>Department of Food Safety/Hygiene and Risk Management, College of Medicine, National Cheng Kung University, Tainan 701, Taiwan.

<sup>4</sup>Division of Cardiovascular Surgery, Department of Surgery and Division of Surgical Critical Care, Department of Critical Care Medicine, Veterans General Hospital, Kaohsiung 813, Taiwan.

<sup>5</sup>Department of Biomedical Science and Environmental Biology, Center for Cancer Research, Kaohsiung Medical University, Kaohsiung 807, Taiwan.

\*Corresponding author: Yun-Ming Wang: ymwang@mail.nctu.edu.tw

**Keywords:** metal-organic framework, nickel foam, immunosensor, cardiac troponin I

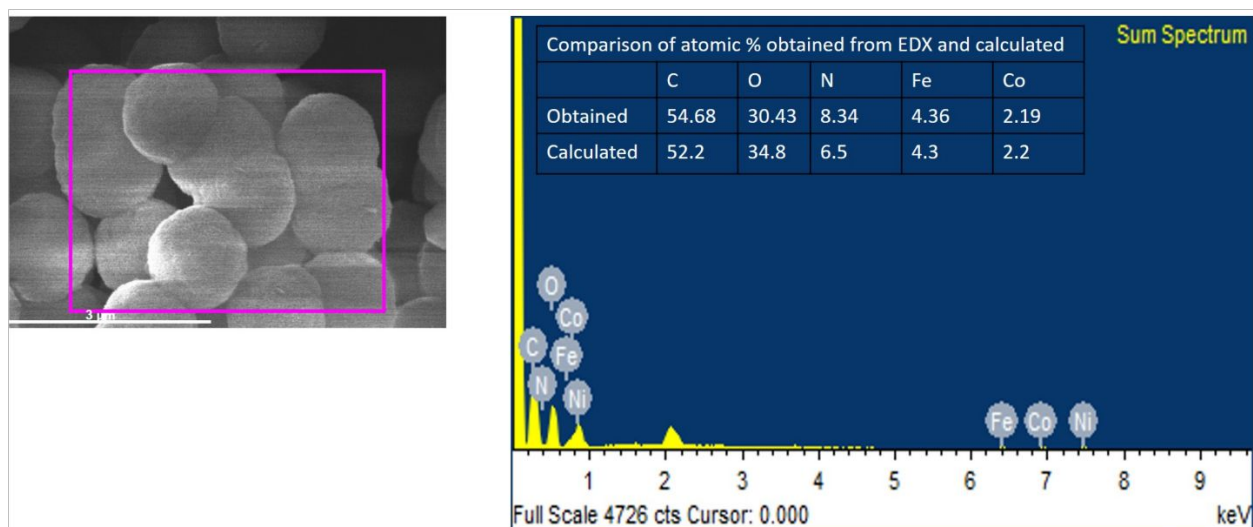

**Figure S1.** SEM image (left) and SEM-EDX obtained from the selected area (right) of  $\text{NH}_2\text{-MIL-88B(Fe}_2\text{Co)-MOF/NF}$  with an inset of table of elemental composition.

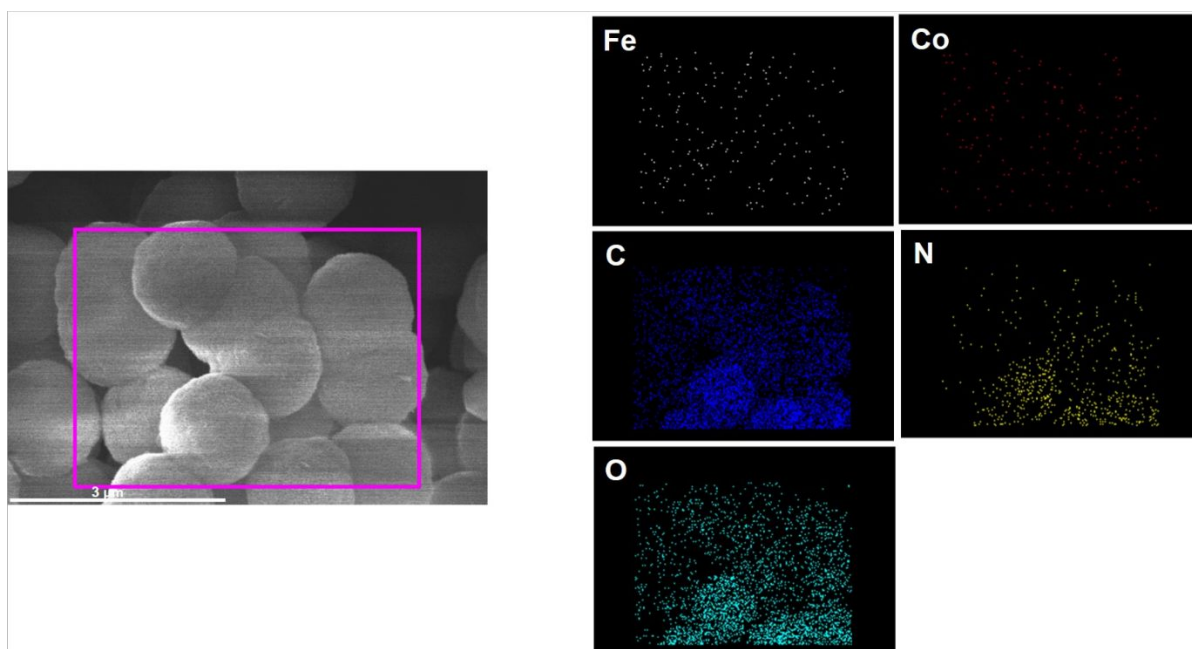

**Figure S2.** The selected SEM image (left) and the area SEM-EDX elemental mapping (right) for C, O, N, Fe, Co and Ni in  $\text{NH}_2\text{-MIL-88B(Fe}_2\text{Co)-MOF/NF}$ .

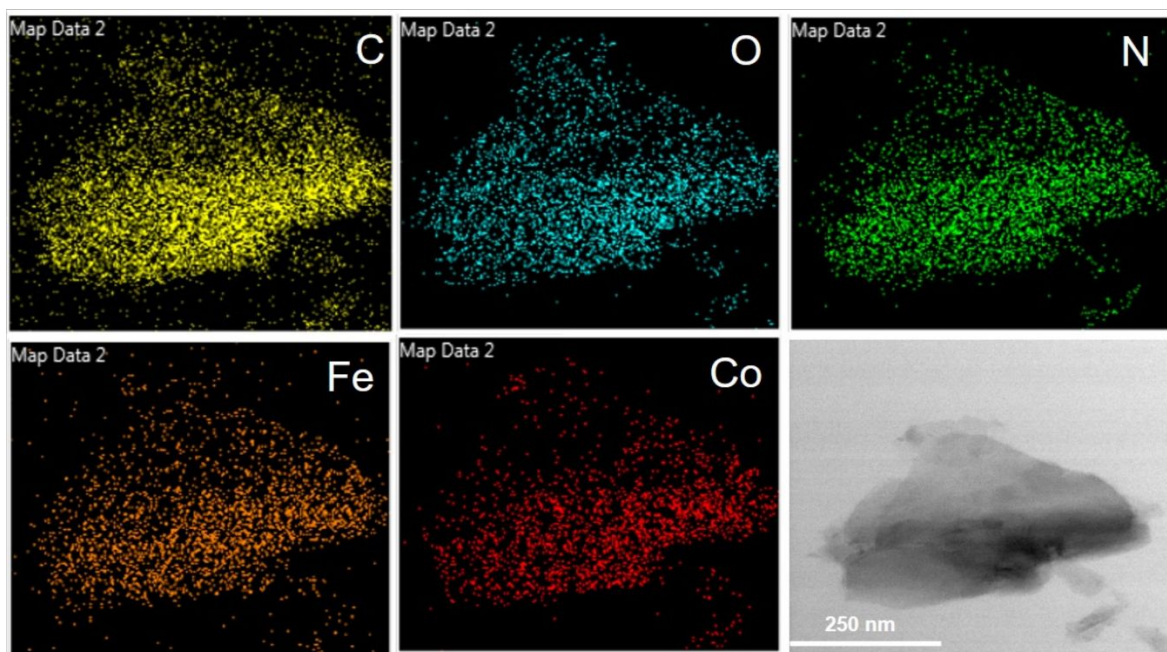

**Figure S3.** TEM image and its corresponding TEM-EDX elemental mapping  $\text{NH}_2\text{-MIL-88B(Fe}_2\text{Co)-MOF/NF}$ .

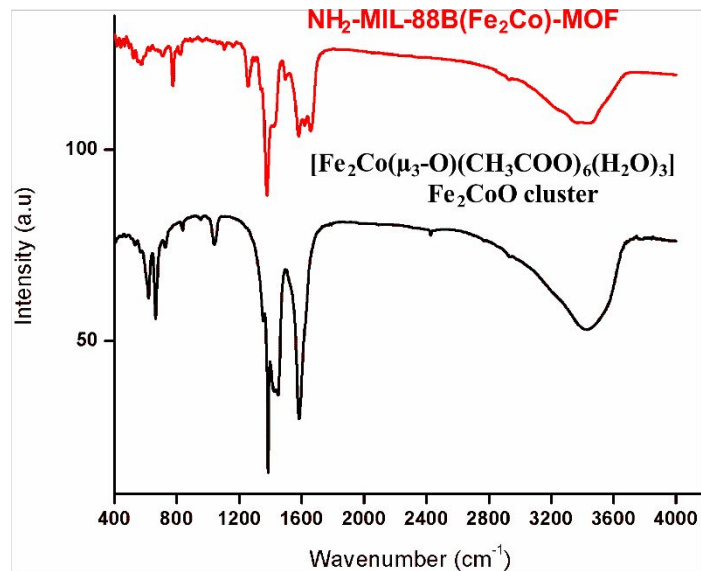

**Figure S4.** FT-IR spectra of  $\text{Fe}_2\text{Co}(\mu_3\text{-O})(\text{CH}_3\text{COO})_6(\text{H}_2\text{O})_3\text{Fe}_2\text{CoO}$  cluster and  $\text{NH}_2\text{-MIL-88B(Fe}_2\text{Co)-MOF/NF}$ .

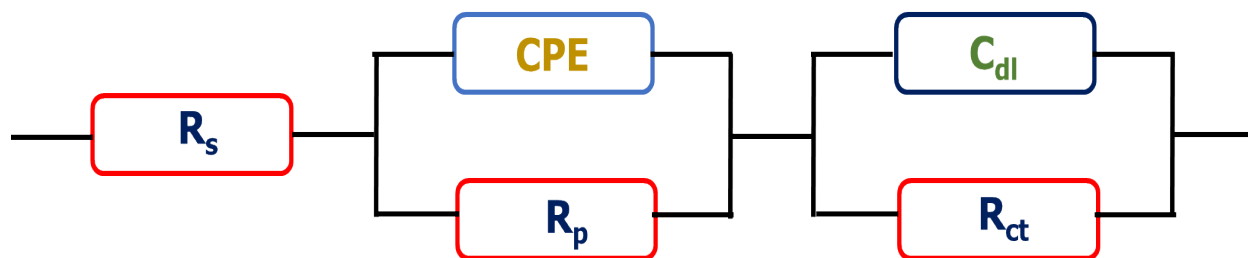

**Figure S5.** Equivalent circuit model for the electrochemical impedance cTnI detection.  $R_s$ ,  $R_p$  and  $R_{ct}$ , represent the electrolyte, electrode porosity, and charge transfer resistance, respectively, whereas the CPE and  $C_{dl}$  represent the constant phase element and double layer capacitance respectively.

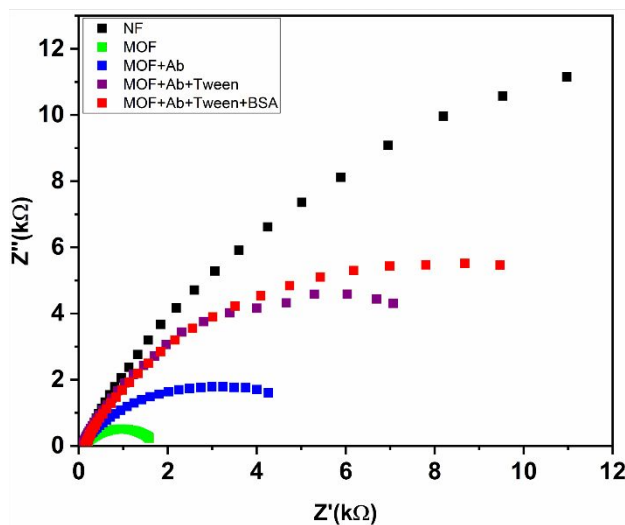

**Figure S6.** Electrochemical measurements for nickel foam (NF) modified MOF electrode (Ab-NH<sub>2</sub>-MIL-88B(Fe<sub>2</sub>Co)-MOF/NF). Nyquist plot obtained from EIS measurements.

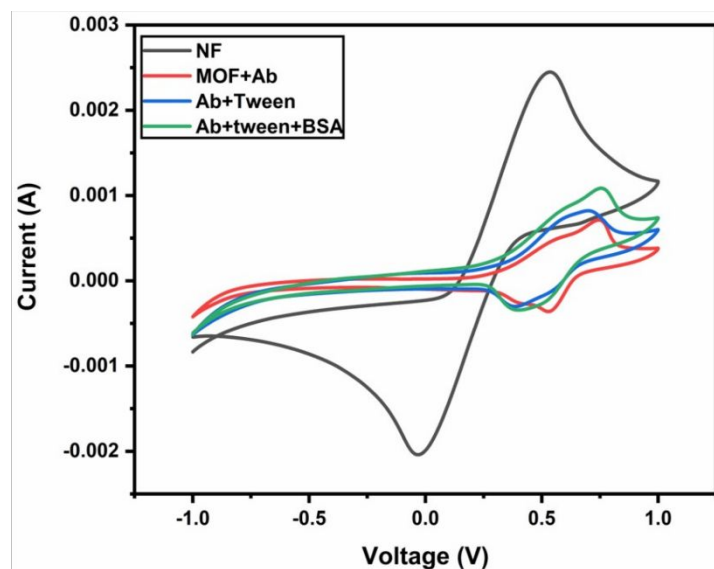

**Figure S7.** Cyclic voltammograms obtained during surface functionalization of electrode with antibody using 10 mM potassium ferricyanide and potassium ferrocyanide as redox couple.

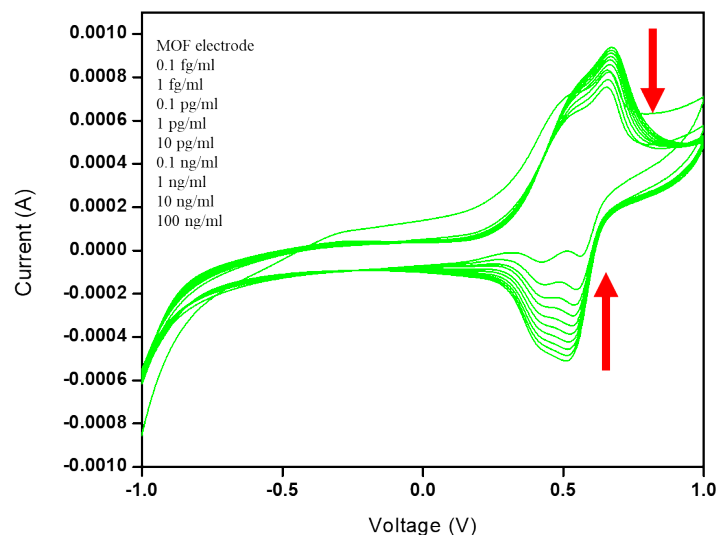

**Figure S8.** Cyclic voltammograms obtained during the cyclic voltammetry analysis of varying concentrations of cTnI (0.1 fg/ml – 100 ng/ml) using 10 mM potassium ferricyanide and potassium ferrocyanide as redox couple.

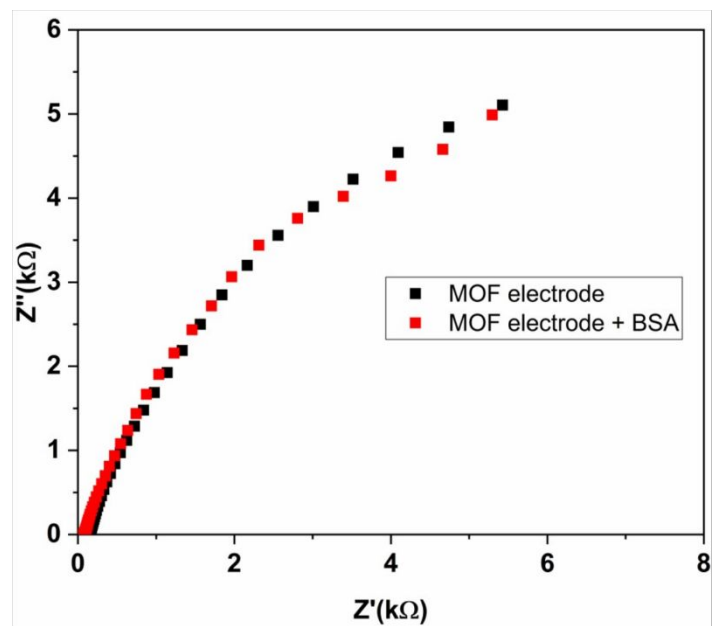

**Figure S9.** Specificity of the MOF electrode in the presence of non-specific BSA (1 mg/ml).
